# Supplementary material for: Report of Adverse Effects Following Population-Wide COVID-19 Vaccination: A Comparative Study between Six Different Vaccines in Baja-California, Mexico
Source: MDPI journal article supplement (doi:10.3390/vaccines10081196), 2022-07-27
Supplement: s1 [file s1]

| Vaccine platform  | Vaccine manufacturer     | Clinical Trials data |                 |                      | Baja-California data |                 |                      |
|-------------------|--------------------------|----------------------|-----------------|----------------------|----------------------|-----------------|----------------------|
|                   |                          | Administered doses   | Reported AE (n) | AE per 100,000 doses | Administered doses   | Reported AE (n) | AE per 100,000 doses |
| mRNA              | Pfizer-BioNTech          | 21,621 [38]          | 5770            | 26,687.01            | 1,282,792            | 1,014           | 79.05                |
|                   | CanSinoBIO               | 18,363 [36]          | 442             | 2,407.01             | 959,990              | 81              | 84.38                |
| Viral vector      | Johnson & Johnson        | 3,356 [35]           | 440             | 13.11                | 1,256,494            | 825             | 65.66                |
|                   | AstraZeneca              | 21,587 [37]          | 8771            | 40,630               | 608,547              | 214             | 35.71                |
|                   | Serum Institute of India | 1200 [31]            | 602             | 50,166.66            | 23,810               | 113             | 474.59               |
| Inactivated virus | Sinovac                  | 5,350,038 [34]       | 2,584           | 48.29                | 248,761              | 38              | 15.28                |
|                   | <i>Total</i>             | <i>5,416,165</i>     | <i>18,609</i>   | <i>343.58</i>        | <i>3,516,394</i>     | <i>2,285</i>    | <i>64.98</i>         |

**Table S1.** Adverse events rates per 100,000 doses reported in Clinical Trials for SARS-CoV-2 vaccines compared with those reported in the Epidemiological Surveillance System of Baja California, Mexico

| Vaccine platform  | Vaccine manufacturer     | Population-based studies data |                 |                      | Baja-California data |                 |                      |
|-------------------|--------------------------|-------------------------------|-----------------|----------------------|----------------------|-----------------|----------------------|
|                   |                          | Administered doses            | Reported AE (n) | AE per 100,000 doses | Administered doses   | Reported AE (n) | AE per 100,000 doses |
| mRNA              | Pfizer-BioNTech          | 27,000,000 [43]               | 171,913         | 636.71               | 1,282,792            | 1,014           | 79.05                |
|                   | CanSinoBIO               | 575,152 [44]                  | 216             | 37.55                | 95,9990              | 81              | 84.38                |
| Viral vector      | Johnson & Johnson        | 7,980,000 [19]                | 13,725          | 171.99               | 1,256,494            | 825             | 65.66                |
|                   | AstraZeneca              | 24,900,000 [43]               | 245,771         | 987.03               | 608,547              | 214             | 35.71                |
|                   | Serum Institute of India | 21,115 [45]                   | 201             | 951.92               | 23,810               | 113             | 474.59               |
| Inactivated virus | Sinovac                  | 20,839,269 [44]               | 6,440           | 30.9                 | 248,761              | 38              | 15.28                |
|                   | <i>Total</i>             | <i>81,315,536</i>             | <i>438,266</i>  | <i>538.96</i>        | <i>3,516,394</i>     | <i>2,285</i>    | <i>64.98</i>         |

**Table S2.** Adverse events rates per 100,000 doses reported in population-based reports and studies reporting adverse events following vaccination against SARS-CoV-2 compared with those reported in the Epidemiological Surveillance System of Baja California, Mexico

| Baseline characteristics            | AZ SII<br>n=113   | Other<br>vaccines<br>n=2172 | p-value |
|-------------------------------------|-------------------|-----------------------------|---------|
| Age - mean $\pm$ SD                 | 50.06 $\pm$ 11.94 | 36.84 $\pm$ 12.84           | <0.0001 |
| Women - n (%)                       | 76 (67.25)        | 1456 (67.03)                | 0.99    |
| Pregnant - n(%)                     | 4 (5.26)          | 25 (1.71)                   | 0.06    |
| History of allergic reaction - n(%) | 13 (11.5)         | 313 (14.41)                 | 0.46    |
| Food                                | 0 (0)             | 45 (2.07)                   | 0.23    |
| Drugs                               | 9 (7.96)          | 172 (7.9)                   | 0.99    |
| Polen                               | 0 (0)             | 26 (1.19)                   | 0.47    |
| Ignores                             | 0 (0)             | 8 (0.36)                    | 0.99    |
| Other                               | 4 (3.53)          | 24 (1.1)                    | 0.06    |

**Table S3.** Post-hoc analysis comparing demographic characteristics and history of allergies between individuals who developed AE in the AZ SII group vs all other vaccines. These analyses are explorative and were conducted after the observed differences between the rates of AE in the SII group compared to the other manufacturers. The present study may not be equipped to make more conclusions about these findings in terms of having enough statistical power to assess these post-hoc analyses.
